# Supplementary material for: A Novel Peptide Binding Prediction Approach for HLA-DR Molecule Based on Sequence and Structural Information
Source: Hindawi journal article supplement (doi:10.1155/2016/3832176), 2016-01-01
Supplement: f1 [file 3832176.f1.pdf]

## Supplementary Materials

Table S1 Predicted result by Score1 function

| PDB  | Allel | Peptide      | Core  | $\alpha = 1$ | $\alpha = 2$ | $\alpha = 3$ | $\alpha = 4$ | $\alpha = 5$ |
|------|-------|--------------|-------|--------------|--------------|--------------|--------------|--------------|
| 1AQ  | DRB1  | VGSDWRFLRGY  | WRFL  | WRFL         | WRFL         | WRFL         | WRFL         | WRFL         |
| 1PY  | DRB1  | XFVKQNAAALX  | FVKQ  | FVKQ         | FVKQ         | FVKQ         | FVKQ         | FVKQ         |
| 1KL  | DRB1  | GELIGILNAAKV | IGILN | IGILN        | IGILN        | IGILN        | IGILN        | IGILN        |
| 2FSE | DRB1  | GELIGTLNAAKV | IGTLN | IGTLN        | IGTLN        | IGTLN        | IGTLN        | IGTLN        |
| 1KL  | DRB1  | AGFKGEQGPKG  | FKGE  | FKGE         | FKGE         | FKGE         | FKGE         | FKGE         |
| 1SJH | DRB1  | PEVIPMFSALE  | VIPM  | VIPM         | VIPM         | VIPM         | VIPM         | VIPM         |
| 1SJE | DRB1  | PEVIPMFSALE  | VIPM  | VIPM         | VIPM         | VIPM         | VIPM         | VIPM         |
| 1T5  | DRB1  | AAYSQATPLLL  | SDQA  | SDQA         | SDQA         | SDQA         | SDQA         | SDQA         |
| 1T5  | DRB1  | AAYSQATPLLL  | SDQA  | SDQA         | SDQA         | SDQA         | SDQA         | SDQA         |
| 2IA  | DRB1  | GELIGTLNAAKV | IGTLN | IGTLN        | IGTLN        | IGTLN        | IGTLN        | IGTLN        |
| 2IPK | DRB1  | GELIGILNAAKV | IGILN | IGILN        | IGILN        | IGILN        | IGILN        | IGILN        |
| 1FYT | DRB1  | XPKWVKQNTLK  | WVK   | WVK          | WVK          | WVK          | WVK          | WVK          |
| 1R5I | DRB1  | PKYVKQNTLKLA | YVKQ  | YVKQ         | YVKQ         | YVKQ         | YVKQ         | YVKQ         |
| 1HX  | DRB1  | PKYVKQNTLKLA | YVKQ  | YVKQ         | YVKQ         | YVKQ         | YVKQ         | YVKQ         |
| 1JW  | DRB1  | PKYVKQNTLKLA | YVKQ  | YVKQ         | YVKQ         | YVKQ         | YVKQ         | YVKQ         |
| 1JW  | DRB1  | PKYVKQNTLKLA | YVKQ  | YVKQ         | YVKQ         | YVKQ         | YVKQ         | YVKQ         |
| 1JW  | DRB1  | PKYVKQNTLKLA | YVKQ  | YVKQ         | YVKQ         | YVKQ         | YVKQ         | YVKQ         |
| 1LO  | DRB1  | PKYVKQNTLKLA | YVKQ  | YVKQ         | YVKQ         | YVKQ         | YVKQ         | YVKQ         |
| 2IC  | DRB1  | PKYVKQNTLKLA | YVKQ  | YVKQ         | YVKQ         | YVKQ         | YVKQ         | YVKQ         |
| 2OJ  | DRB1  | PKYVKQNTLKLA | YVKQ  | YVKQ         | YVKQ         | YVKQ         | YVKQ         | YVKQ         |
| 2G9  | DRB1  | PKYVKQNTLKLA | YVKQ  | YVKQ         | YVKQ         | YVKQ         | YVKQ         | YVKQ         |
| 2IA  | DRB1  | PKYVKQNTLKLA | YVKQ  | YVKQ         | YVKQ         | YVKQ         | YVKQ         | YVKQ         |
| 1A6  | DRB1  | PVSKMRMATPL  | MRM   | MRM          | MRM          | MRM          | MRM          | MRM          |
| 1J8  | DRB1  | PKYVKQNTLKLA | YVKQ  | YVKQ         | YVKQ         | YVKQ         | YVKQ         | YVKQ         |
| 2SE  | DRB1  | AYMRADAAAG   | MRA   | MRA          | MRA          | MRA          | MRA          | MRA          |
| 1BX  | DRB1  | ENPVVHFFKNIV | VHFF  | VHFF         | VHFF         | VHFF         | VHFF         | VHFF         |
| 1YM  | DRB1  | ENPVVHFFKNIV | VHFF  | VHFF         | VHFF         | VHFF         | VHFF         | VHFF         |
| 1FV  | DRB5  | NPVVHFFKNIVT | FKNIV | KNIVT        | KNIVT        | KNIVT        | KNIVT        | KNIVT        |
| 1H1  | DRB5  | GGVYHFVKKHV  | YHFV  | YHFV         | YHFV         | YHFV         | YHFV         | YHFV         |
| 1ZG  | DRB5  | VHFFKNIVTPRT | FKNIV | KNIVT        | KNIVT        | KNIVT        | KNIVT        | KNIVT        |
| Resu |       |              |       | 4            | 4            | 4            | 4            | 4            |

Table S2 Predicted result by Score2 function

| PDB  | Allele | Peptide       | Core  | $\alpha = 1$ | $\alpha = 2$ | $\alpha = 3$ | $\alpha = 4$ | $\alpha = 5$ |
|------|--------|---------------|-------|--------------|--------------|--------------|--------------|--------------|
| 1AQ  | DRB1   | VGSDWRFLRGY   | WRFL  | VGSD         | WRFL         | WRFL         | WRFL         | WRFL         |
| 1PY  | DRB1   | XFVKQNAAALX   | FVKQ  | FVKQ         | FVKQ         | FVKQ         | FVKQ         | FVKQ         |
| 1KL  | DRB1   | GELIGILNAAKVP | IGILN | LIGIL        | LIGILN       | LIGILN       | LIGILN       | LIGILN       |
| 2FSE | DRB1   | GELIGTLNAAKV  | IGTLN | LIGTL        | LIGTL        | LIGTL        | LIGTL        | LIGTL        |
| 1KL  | DRB1   | AGFKGEQGPKG   | FKGE  | FKGE         | FKGE         | FKGE         | FKGE         | FKGE         |
| 1SJH | DRB1   | PEVIPMFSALE   | VIPM  | VIPM         | VIPM         | VIPM         | VIPM         | VIPM         |
| 1SJE | DRB1   | PEVIPMFSALE   | VIPM  | VIPM         | VIPM         | VIPM         | VIPM         | VIPM         |
| 1T5  | DRB1   | AAYSDQATPLLL  | YSDQ  | AYSD         | AYSD         | AYSD         | AYSD         | AYSD         |
| 1T5X | DRB1   | AAYSDQATPLLL  | YSDQ  | AYSD         | AYSD         | AYSD         | AYSD         | AYSD         |
| 2IAN | DRB1   | GELIGTLNAAKV  | IGTLN | LIGTL        | LIGTL        | LIGTL        | LIGTL        | LIGTL        |
| 2IPK | DRB1   | GELIGILNAAKVP | IGILN | LIGIL        | LIGILN       | LIGILN       | LIGILN       | LIGILN       |
| 1FYT | DRB1   | XPKVWKQNTLK   | WVK   | WVK          | WVK          | WVK          | WVK          | WVK          |
| 1R5I | DRB1   | PKYVKQNTLKLA  | YVKQ  | YVKQ         | YVKQ         | YVKQ         | YVKQ         | YVKQ         |
| 1HX  | DRB1   | PKYVKQNTLKLA  | YVKQ  | YVKQ         | YVKQ         | YVKQ         | YVKQ         | YVKQ         |
| 1JW  | DRB1   | PKYVKQNTLKLA  | YVKQ  | YVKQ         | YVKQ         | YVKQ         | YVKQ         | YVKQ         |
| 1JW  | DRB1   | PKYVKQNTLKLA  | YVKQ  | YVKQ         | YVKQ         | YVKQ         | YVKQ         | YVKQ         |
| 1JW  | DRB1   | PKYVKQNTLKLA  | YVKQ  | YVKQ         | YVKQ         | YVKQ         | YVKQ         | YVKQ         |
| 1LO  | DRB1   | PKYVKQNTLKLA  | YVKQ  | YVKQ         | YVKQ         | YVKQ         | YVKQ         | YVKQ         |
| 2IC  | DRB1   | PKYVKQNTLKLA  | YVKQ  | YVKQ         | YVKQ         | YVKQ         | YVKQ         | YVKQ         |
| 2OJE | DRB1   | PKYVKQNTLKLA  | YVKQ  | YVKQ         | YVKQ         | YVKQ         | YVKQ         | YVKQ         |
| 2G9  | DRB1   | PKYVKQNTLKLA  | YVKQ  | YVKQ         | YVKQ         | YVKQ         | YVKQ         | YVKQ         |
| 2IA  | DRB1   | PKYVKQNTLKLA  | YVKQ  | YVKQ         | YVKQ         | YVKQ         | YVKQ         | YVKQ         |
| 1A6  | DRB1   | PVSKMRMATPL   | MRM   | MRM          | MRM          | MRM          | MRM          | MRM          |
| 1J8H | DRB1   | PKYVKQNTLKLA  | YVKQ  | KQNT         | YVKQ         | YVKQ         | YVKQ         | YVKQ         |
| 2SEB | DRB1   | AYMRADAAAGG   | MRA   | MRA          | MRAD         | MRAD         | MRAD         | MRAD         |
| 1BX  | DRB1   | ENPVVHFFKNIV  | VHFF  | VHFF         | VHFFK        | VHFFK        | VHFFK        | VHFFK        |
| 1YM  | DRB1   | ENPVVHFFKNIV  | VHFF  | VHFF         | VHFFK        | VHFFK        | VHFFK        | VHFFK        |
| 1FV  | DRB5   | NPVVHFFKNIVT  | FKNIV | KNIV         | KNIVT        | KNIVT        | KNIVT        | KNIVT        |
| 1H1  | DRB5   | GGVYHFVKKHV   | YHFV  | YHFV         | YHFV         | YHFV         | YHFV         | YHFV         |
| 1ZGL | DRB5   | VHFFKNIVTPRTP | FKNIV | KNIV         | KNIVT        | KNIVT        | KNIVT        | KNIVT        |
| Resu |        |               |       | 10           | 8            | 8            | 8            | 8            |

Table S3 Predicted result by Score3 function

| PDB ID  | Allele    | Peptide                 | Core      | $\alpha = 1$ | $\alpha = 2$ | $\alpha = 3$ | $\alpha = 4$ | $\alpha = 5$ |
|---------|-----------|-------------------------|-----------|--------------|--------------|--------------|--------------|--------------|
| 1AQD    | DRB1*0101 | VGSDWRFLRGYHQYA         | WRFLRGYHQ | VGSDWRFLR    | VGSDWRFLR    | WRFLRGYHQ    | WRFLRGYHQ    | WRFLRGYHQ    |
| 1PYW    | DRB1*0101 | XFVKQNAAALX             | FVKQNAAAL | FVKQNAAAL    | FVKQNAAAL    | FVKQNAAAL    | FVKQNAAAL    | FVKQNAAAL    |
| 1KLG    | DRB1*0101 | GELIGILNAAKVPAD         | IGILNAAKV | LIGILNAAK    | LIGILNAAK    | LIGILNAAK    | LIGILNAAK    | LIGILNAAK    |
| 2FSE    | DRB1*0101 | GELIGTLNAAKVPAD         | IGTLNAAKV | LIGTLNAAK    | LIGTLNAAK    | LIGTLNAAK    | LIGTLNAAK    | LIGTLNAAK    |
| 1KLU    | DRB1*0101 | AGFKGEQGPKGEPG          | FKGEQGPKG | FKGEQGPKG    | FKGEQGPKG    | FKGEQGPKG    | FKGEQGPKG    | FKGEQGPKG    |
| 1SJH    | DRB1*0101 | PEVIPMFSALESEG          | VIPMFSAVS | VIPMFSAVS    | VIPMFSAVS    | VIPMFSAVS    | VIPMFSAVS    | VIPMFSAVS    |
| 1SJE    | DRB1*0101 | PEVIPMFSALESEGATP       | VIPMFSAVS | VIPMFSAVS    | VIPMFSAVS    | VIPMFSAVS    | VIPMFSAVS    | VIPMFSAVS    |
| 1T5W    | DRB1*0101 | AAYSDQATPLLLSPR         | YSDQATPLL | AYSDQATPL    | AYSDQATPL    | AYSDQATPL    | AYSDQATPL    | AYSDQATPL    |
| 1T5X    | DRB1*0101 | AAYSDQATPLLLSPR         | YSDQATPLL | AYSDQATPL    | AYSDQATPL    | AYSDQATPL    | AYSDQATPL    | AYSDQATPL    |
| 2IAN    | DRB1*0101 | GELIGTLNAAKVPAD         | IGTLNAAKV | LIGTLNAAK    | LIGTLNAAK    | LIGTLNAAK    | LIGTLNAAK    | LIGTLNAAK    |
| 2IPK    | DRB1*0101 | GELIGILNAAKVPAD         | IGILNAAKV | LIGILNAAK    | LIGILNAAK    | LIGILNAAK    | LIGILNAAK    | LIGILNAAK    |
| 1FYT    | DRB1*0101 | XPKVVKQNTLKLAT          | VVKQNTLKL | VVKQNTLKL    | VVKQNTLKL    | VVKQNTLKL    | VVKQNTLKL    | VVKQNTLKL    |
| 1R5I    | DRB1*0101 | PKYVKQNTLKLAT           | YVKQNTLKL | YVKQNTLKL    | YVKQNTLKL    | YVKQNTLKL    | YVKQNTLKL    | YVKQNTLKL    |
| 1HXY    | DRB1*0101 | PKYVKQNTLKLAT           | YVKQNTLKL | YVKQNTLKL    | YVKQNTLKL    | YVKQNTLKL    | YVKQNTLKL    | YVKQNTLKL    |
| 1JWM    | DRB1*0101 | PKYVKQNTLKLAT           | YVKQNTLKL | YVKQNTLKL    | YVKQNTLKL    | YVKQNTLKL    | YVKQNTLKL    | YVKQNTLKL    |
| 1JWS    | DRB1*0101 | PKYVKQNTLKLAT           | YVKQNTLKL | YVKQNTLKL    | YVKQNTLKL    | YVKQNTLKL    | YVKQNTLKL    | YVKQNTLKL    |
| 1JWU    | DRB1*0101 | PKYVKQNTLKLAT           | YVKQNTLKL | YVKQNTLKL    | YVKQNTLKL    | YVKQNTLKL    | YVKQNTLKL    | YVKQNTLKL    |
| 1LO5    | DRB1*0101 | PKYVKQNTLKLAT           | YVKQNTLKL | YVKQNTLKL    | YVKQNTLKL    | YVKQNTLKL    | YVKQNTLKL    | YVKQNTLKL    |
| 2ICW    | DRB1*0101 | PKYVKQNTLKLAT           | YVKQNTLKL | YVKQNTLKL    | YVKQNTLKL    | YVKQNTLKL    | YVKQNTLKL    | YVKQNTLKL    |
| 2OJE    | DRB1*0101 | PKYVKQNTLKLAT           | YVKQNTLKL | YVKQNTLKL    | YVKQNTLKL    | YVKQNTLKL    | YVKQNTLKL    | YVKQNTLKL    |
| 2G9H    | DRB1*0101 | PKYVKQNTLKLAT           | YVKQNTLKL | YVKQNTLKL    | YVKQNTLKL    | YVKQNTLKL    | YVKQNTLKL    | YVKQNTLKL    |
| 2IAM    | DRB1*0101 | PKYVKQNTLKLAT           | YVKQNTLKL | YVKQNTLKL    | YVKQNTLKL    | YVKQNTLKL    | YVKQNTLKL    | YVKQNTLKL    |
| 1A6A    | DRB1*0301 | PVSKMRMATPLLMQA         | MRMATPLLM | MRMATPLLM    | MRMATPLLM    | MRMATPLLM    | MRMATPLLM    | MRMATPLLM    |
| 1J8H    | DRB1*0401 | PKYVKQNTLKLAT           | YVKQNTLKL | YVKQNTLKT    | YVKQNTLKT    | YVKQNTLKT    | YVKQNTLKT    | YVKQNTLKT    |
| 2SEB    | DRB1*0401 | AYMRADAAAGGA            | MRADAAAGG | MRADAAAGG    | MRADAAAGG    | MRADAAAGG    | MRADAAAGG    | MRADAAAGG    |
| 1BX2    | DRB1*1501 | ENPVVHFFKNIVTPR         | VHFFKNIVT | VHFFKNIVT    | VHFFKNIVT    | VHFFKNIVT    | VHFFKNIVT    | VHFFKNIVT    |
| 1YMM    | DRB1*1501 | ENPVVHFFKNIVTPRGGSGGGGG | VHFFKNIVT | VHFFKNIVT    | VHFFKNIVT    | VHFFKNIVT    | VHFFKNIVT    | VHFFKNIVT    |
| 1FV1    | DRB5*0101 | NPVVHFFKNIVTPRTPPPSQ    | FKNIVTPRT | KNIVTPRTP    | KNIVTPRTP    | KNIVTPRTP    | KNIVTPRTP    | KNIVTPRTP    |
| 1H15    | DRB5*0101 | GGVYHFVKKHVVES          | YHFVKKHVH | YHFVKKHVH    | YHFVKKHVH    | YHFVKKHVH    | YHFVKKHVH    | YHFVKKHVH    |
| 1ZGL    | DRB5*0101 | VHFFKNIVTPRTPGG         | FKNIVTPRT | KNIVTPRTP    | KNIVTPRTP    | KNIVTPRTP    | KNIVTPRTP    | KNIVTPRTP    |
| Results |           |                         |           | 9 errors     | 9 errors     | 8 errors     | 8 errors     | 8 errors     |
